# Supplementary material
Source: Springer Nature journal article supplement (https://www.springermedizin.de/resource/supplementary/12961_2008_77_MOESM1_ESM.pdf/9571430)
Supplement: MOESM1 [file 9571430]

INQUIRING

DECIDING

RELATING

INTERPRETING

**Providers:**

- Cannot use information system effectively
- Express a “punch-the-clock” mentality

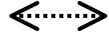

- Have little time to deliberate & evaluate decisions & nurses defer decisions to physicians

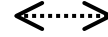

- Are resistant to change
- Lack proper motivation

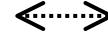

- Don't form judgments about what is needed to improve practices

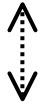

**Patient Care Teams:**

- Fail to monitor single & double-loop learning processes

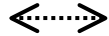

- Don't fully vet the results of decisions

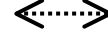

- Don't form practice teams
- Fail to provide feedback

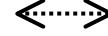

- Don't form practical knowledge and “buy-in”

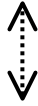

**Organization:**

- Fails to address deutero-loop learning

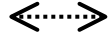

- Fails to deliver learning resources to teams

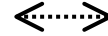

- Avoids risk
- Doesn't share new knowledge

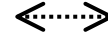

- Fails at knowledge management
